# Supplementary material
Source: publisher site journal article supplement (https://www.dovepress.com/article/388234)
Supplement: Supplementary file 1 [file get_supplementary_file.php]

**Supporting information**

**Materials**

Sunitinib, Sialic acid, ibuprofen and 4-Dimethylaminopyridine (4-DMAP) were purchased from Aladdin Bio-chem Technology Co., Limited (Shanghai, China). HOOC-PEG-NH2 (MW= 2.0 Kda), N-(3-Dimethylaminopropyl)-N’-ethylcarbodiimide hydrochloride (EDC) and N-Hydroxysuccinimide (NHS) were purchased from Macklin Bio-chem Technology Co., Limited. (Shanghai, China). COX2/ Cyclooxygenase 2/ PTGS2 Monoclonal Antibody was purchased form Proteintech Group Co. Limited. (WuHan, China).

Human embryonic kidney 293T cells (HEK 293T), Clear cell carcinoma of human kidney 786-O cells and Human renal cell adenocarcinoma cell ACHN were purchased from Procell Life Science&Technology Co., Limited. (Wuhan, China) 293T cells, 786-O cells and ACHN cells were respectively cultured in DMEM medium (Procell Life Science&Technology), RPMI 1640 medium (Procell Life Science&Technology) and MEM medium (Procell Life Science&Technology) with 10% fetal bovine serum (FBS) (Procell Life Science&Technology) and 1% penicillin/streptomycin (Procell Life Science&Technology) at 37°C in 5% CO2 atmosphere.

BALB/c nude mice (male, 4-5 weeks, 16-18 g) were purchased from Vital River Laboratory Animal Technology Co., Limited. (Zhejiang, China). The animals were fed feed and water after a strict disinfection process. All animal experiments were carried out in compliance with Animal 55, 2001) and the Animal Experiment Ethics Review of QingDao University.

**E-Selectin**

**
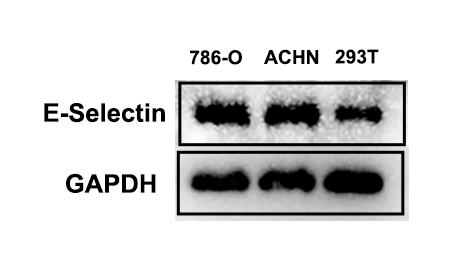
**

**Supporting Figure S1. The protein expression level of E-selectin in 786-O, ACHN and 293T cell lines.**

**Synthetic Route**


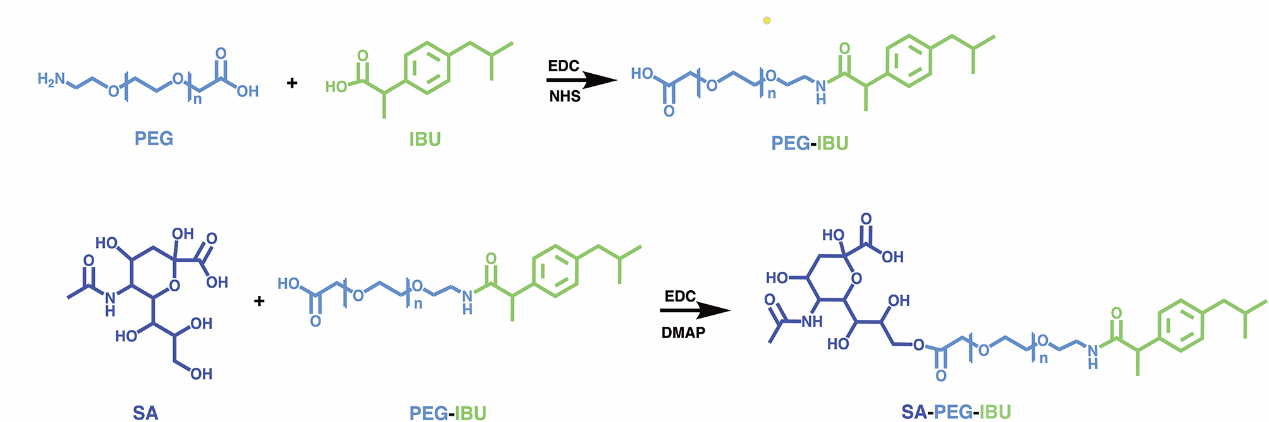


**Supporting Figure S2. Schematic diagram of SPI chemical synthesis steps about SA-PEG-IBU conjugation.**

**1H NMR**


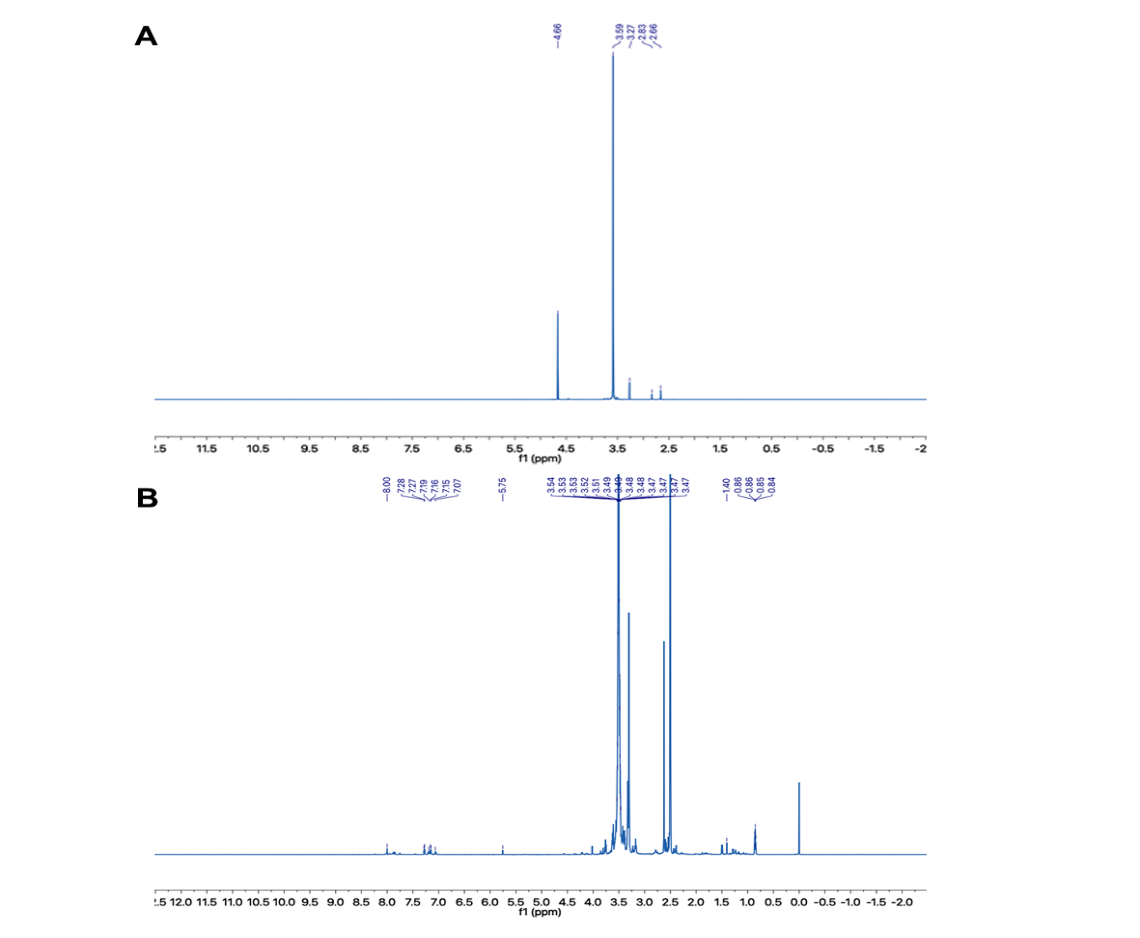


**Supporting Figure S3. (A) The 1H NMR spectra of HOOC-PEG-NH2, (B) The 1H NMR spectra of HOOC-PEG-IBU.**

**CMC**


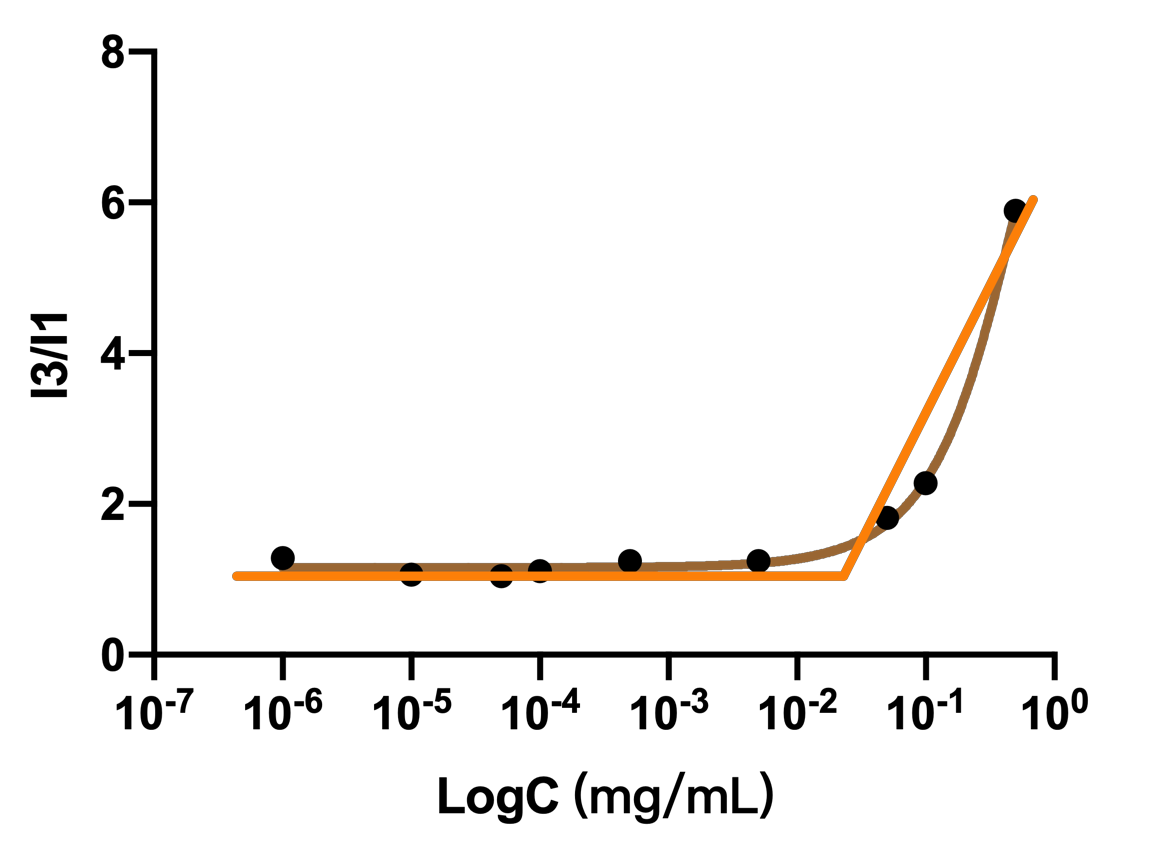


**Supporting Figure S4. The CMC was measured by the light scattering intensity of blank SPI at different concentrations. The inflection point represents the critical micelle concentration.**

**Hemolysis rate**


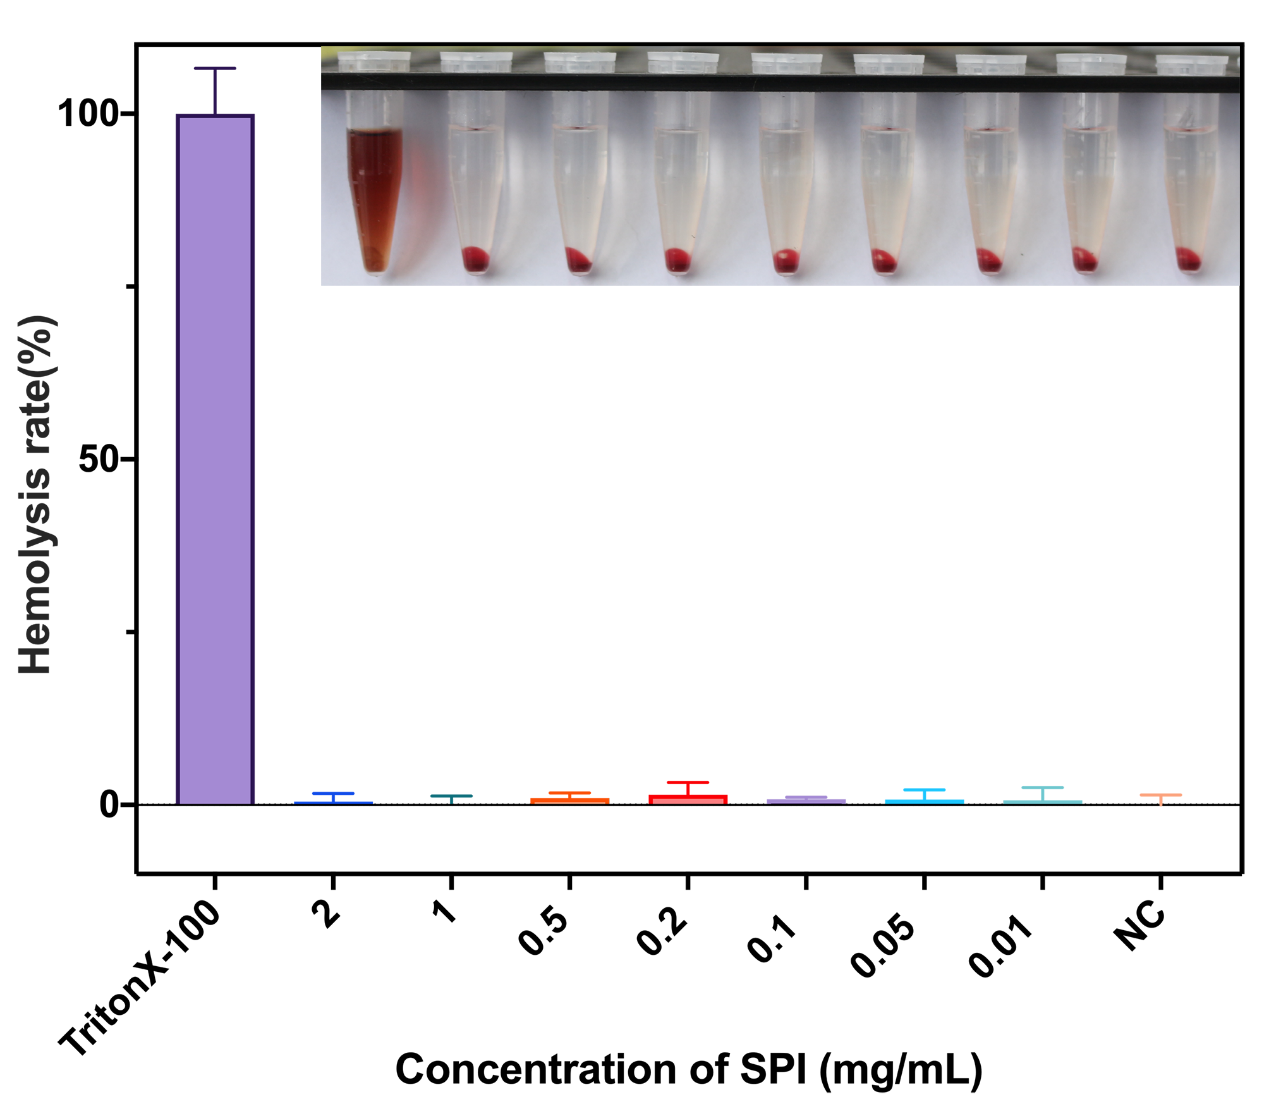


**Supporting Figure S5 Pictures of hemolytic tests and hemolysis rates of SA-PEG-IBU conjugate.**

SPI micelles with a concentration of 0.01-2 mg/mL were incubated in a shaker at 37 ° C for 3 hours with a 2% erythrocyte suspension. The positive control was 2% Triton X-100, whereas the negative control was PBS. After incubation, centrifugation was performed for 10 minutes at 4°C and 3000rpm. At 540nm, the supernatant's UV absorbance was measured, and the hemolysis rate at each concentration was estimated. The lack of evident hemolysis at all doses, as illustrated in the picture, demonstrates the SPI micelles' good biocompatibility.

**Pseudopodia form**


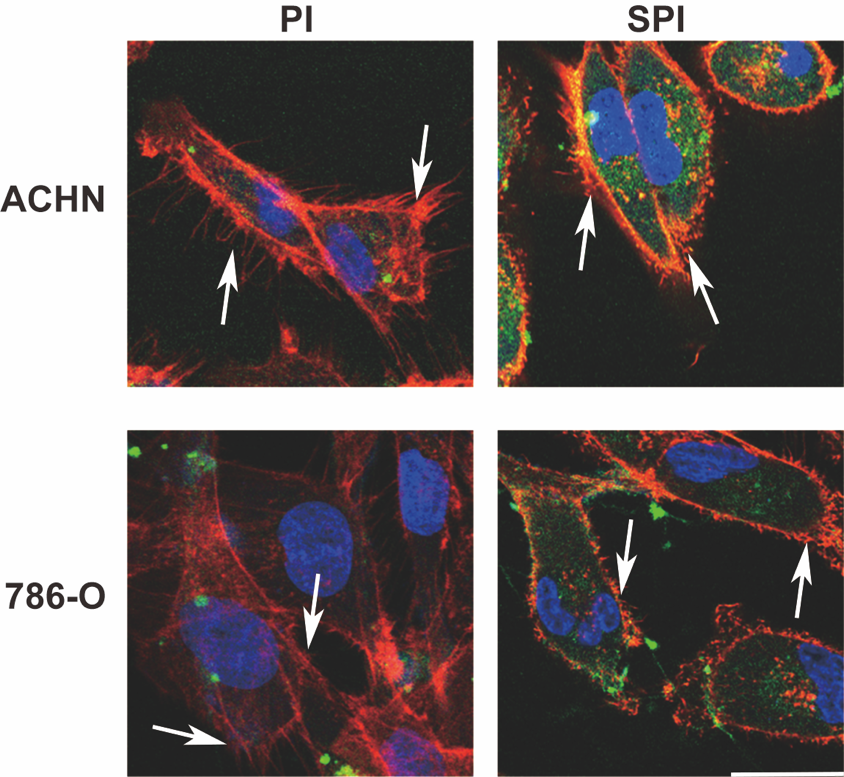


**Supporting Figure S6. The Confocal microscope image of 786-O cell and ACHN lines after incubation with SPI micelles and PI micelles.** **White arrows indicate the pseudopodia of the cell.** (**The image is an enlarged version of Figure 4). The scale bar is 25μm.**
